# Supplementary material
Source: Frontiers journal article supplement (https://www.frontiersin.org/articles/429624)
Supplement: Data_Sheet_1.docx [file Data_Sheet_1.docx]

Supplementary Material

Social innovation in community energy in Europe: a review of the evidence

Richard J. Hewitt1*, Nicholas Bradley2, Andrea Baggio Compagnucci1, Carla Barlagne2, Andrzej Ceglarz3,4,5, Roger Cremades6, Margaret McKeen1, Ilona Otto4, and Bill Slee2

*** Correspondence:**Richard J. Hewitt
Richard.hewitt@hutton.ac.uk

# List of key sources for CE in 8 study countries.

| Country | Key internet sources for CE | Key literature sources for CE |
| --- | --- | --- |
| Belgium | Rapport Hernieuwbare Energie, page 25-26, 2011. <https://www.serv.be/sites/default/files/documenten/SERV_RAP_20110406_hernieuwbareenergie_deel3_hfdst3.pdf>  Vents de Raison, accessed 7/11/2018, <http://www.ventderaison.com/dossiers/sante-publique>  Apere, <http://apere.org/fr/cooperatives-0>  Ecopower cooperative  <https://www.ecopower.be/>  Moulins de haute Pays coop group  <https://www.emissions-zero.coop/page/photovoltaique> | Pepermans and Loots (2013).  Bauwens et al (2016).  Bauwens and Defourny (2017). |
| France | Enercoop, 2018. Website: <http://www.enercoop.fr/decouvrir-enercoop/notre-metier>, accessed [26/06/18]  Energie partagée Etudes, 2018. Website: <https://energie-partagee.org/energie-partagee-etudes-un-outil-pour-le-developpement/>, accessed [26/06/18] | Christen and Hamman (2015).  Robinet (2015).  Poize and Rüdinger (2014). |
| Germany | Bündnis Bürgerenergie e.V. (2016). Das Bremer Manifest. <https://www.bremer-manifest.de/start/>  Accessed 23/03/2018  Greenpeace Energy  <https://www.greenpeace-energy.de/privatkunden.html>  BürgerEnergie Lübeck eG i.G.  <https://www.buergerenergie-luebeck.de/>  Energiegenossenschaft Fürth eG  <https://nahwaerme-fuerth.jimdo.com> | Oppen et al (2017).  Kahla et al (2017).  Holstenkamp and Kahla (2016) |
| Italy | Consorzio Elettrico Industriale Stenico  <https://www.ceis-stenico.it/ceis-stenico/struttura.html>  So.ge.nu.s Spa  <https://www.sogenus.com/>  Granara Villaggio Ecologico  <https://www.granara.org/> | Kunze and Becker (2015).  Magnani and Osti (2016).  Candelise and Ruggieri (2017) |
| Poland | Ministry of Energy, (2018). Zestawienie klastrów energii i inicjatyw klastrowych [Juxtaposition of the energy clusters and the cluster initiatives], online at: <http://www.me.gov.pl/Energetyka/Klastry+energii/Zestawienie+klastrow+energii+i+inicjatyw+klastrowych>  Accessed on 2 May 2018. | Ancygier and Szulecki (2014)  Hipsz (2015)  Gwiazda (2016) |
| Spain | Unión Renovables Coop (2018). Organisation website. <http://www.unionrenovables.coop/>  Somenergia cooperative  <https://www.somenergia.coop/es/>  Viure del Aire (2018). Organisation website. <http://www.viuredelaire.cat/> | Romero-Rubio and Andrés Díaz (2015).  Capellán-Pérez et al (2018).  Heras-Saizarbitoria et al (2018). |
| Sweden | Ingvar-Nilsson, N. J., Elmquist, H. & Wallemyr, S. 2014. Qvinnovindar– Falbygden [Online]. Lantbrukarnas Riksförbund. Available: <https://www.lrf.se/globalassets/dokument/foretagande/de-grona-naringarna/fornybar-energi/framtidsforetag/qvinnovindar_energifakta.pdf>  [Accessed May 3 2018].  Solbyn ecovillage  <https://theecologist.org/2015/feb/23/green-living-swedens-ecological-village-solbyn>  Farmarenergi i Eslöv AB  <https://www.lrf.se/globalassets/dokument/foretagande/de-grona-naringarna/fornybar-energi/framtidsforetag/feab_energifakta.pdf> | Kooij et al (2018).  Magnusson (2016).  Wizelius (2018). |
| United Kingdom | Grassroots innovations website  <https://grassrootsinnovations.org/>  Community Energy Scotland  <http://www.communityenergyscotland.org.uk/>  Energy4All,  family of 23 independent renewable-energy co-operatives  <https://energy4all.co.uk/> | The Cooperative and Co-operatives UK (2012)  Seyfang et al (2013).  Harnmeijer et al. (2018). |
| Europe-wide | The energy Archipelago  <https://energyarchipelago.com/>  REScoop website  <https://www.rescoop.eu/> | Becker and Kunze (2014). |

# Summary of main CE developments in each case study country. See also Figs 2-9.

| Country | Summary of characteristics | Typical structures |
| --- | --- | --- |
| Belgium | CE in Belgium occupies a marginal role in a market that is heavily dominated by incumbent provider Electrabel (Bauwens et al 2016).  CE is mainly energy cooperatives dedicated to electricity generation (e.g BeauVent) or supply (e.g. Ecopower), typically having the form " Coöperatieve Vennootschap  Belgian renewable energy cooperatives have formed into federations to represent their joint interests. These federations, which include Rescoop.be and Ecopower, have been a driving force behind the organization of larger European networks including Rescoop.eu.  Legislation in Wallonia requiring new projects to be opened to citizen and municipal capital investment has led to the parallel formation of “industrial cooperatives” such as "Electrabel Cogreen, Lampiris, and Eoly" owned by energy incumbents (e.g. Electrabel) that are open to citizen investment but do not offer the normal benefits of conventional REScoops, such as co-ownership of installations, to shareholders (Bauwens et al 2016). | Coöperatieve Vennootschap met Beperkte Aansprakelijkheid" or CVBA. Similar to the French "SCIC" and the American "Limited Liability Company" and enable communities to organize under a legal entity which permits collective ownership status. (Robinet 2015). |
| France | Energy sector in France traditionally highly centralized, but moved towards decentralization and increased involvement of municipalities after 2000. Feed-in Tariffs (FiTs) introduced 2001. Communities not seen as motors of energy transition until recently. France less advanced than e.g. Germany, Denmark and Belgium (Grandjean, 2014). Citizen energy projects “just emerging” in France in 2014 (Poize and Rüdinger 2014).  Jobert et al. (2007) identify RE projects driven by local actors, but note little benefit to or involvement of local people. However, increasingly, municipality-driven “Shared energy” projects open up shares to local residents (Christen and Hamman 2015).  Following the energy transition law of 2015, the Pluriannual Energy Program 2016 provides the legal framework for an increased crowdfunding contribution to the capital of the societies for renewable energies through the purchase of shares. It is hoped that increased citizen contribution to those projects thanks to crowdfunding will increase their territorial anchorage through increase local ownership of the projects. | Societé par Actions Simplifiées (SAS), similar to the “limited liability company” in the United States, and the “limited company” in Britain and have a president and shareholders, who are usually local residents.  SCIC (Société Coopérative d'Intéret Collectif) = Cooperative Society of Collective Interest |
| Germany | Dynamic expansion of cooperatives and other types of community energy initiative between 2000 and 2013 (Becker et al 2017; citing Radtke, 2016). Move to re-municipalisation (Wagner and Berlo 2017); bio-energy villages – 50% of production owned by farmer’s collectives and consumers (Boch und Polach et al., 2015).  Most energy cooperatives in Germany today are solar cooperatives, and while wind energy initiatives have continued to grow, they have mostly adopted the GmbH & Co. KG model, where voting rights depend on the proportion of capital invested, not on the traditional “one member, one vote” cooperative principal (Bauwens et al 2016). These wind partnerships, which reflect a more diluted interpretation of CE, were not mapped in our study.  CE “mainstreamed” through citizens’ networks of producers working towards a decentralized energy transition (“Energiewende”) beyond the interests of centralised production of the big energy industry (Bündnis Bürgerenergie e.V., 2016).  Some cases of citizens’ group “buy-backs” of local electricity networks from incumbent operators (Magnani and Osti 2016). | Bürgerenergiegesellschaften (Citizens' energy companies), Energiegenossenschaften (energy cooperatives)  GmbH & Co. KG (limited partnerships with a limited liability company as a partner)  GbR (Civil society partnerships) |
| Italy | Community energy in Italy has its roots in the hydro-electricity cooperatives of the 1900s, but expanded significantly after 2006 as part of a generalized growth of RE nationally. CE includes a variety of initiatives with shared interest in RE (generation or consumption) with a variety of organizational forms of which the most common is the Societa’ cooperativa (SC), an old and well-known institutional form in Italy. Some energy SCs are reconfigurations of historical hydro and thermal cooperatives.  CE initiatives tend to have a strong sense of collective identity around territory and shared values of sustainability. This results in some notable CE success stories despite recent lack of support from central government.  Local government often plays a key role, e.g. as drivers or coordinators or facilitators of CE projects, either by providing the necessary assets (e.g. rooftops) or by creating supportive local regulatory and financing conditions (Candelise and Ruggieri 2017). | Societa’ cooperativa (Cooperative society) |
| Poland | Heavily fossil-fuel dependent economy, with slow uptake of RE, almost stagnant in recent years (Eurostat)  Electricity sector dominated by state-owned power utilities that together control over 75% of the market (Szulecki, 2018b). Wind power saw a strong increase 2005-2016 (PSEW, 2017), sharply reduced after 2016 following new regulations on development of wind turbines in built-up areas (Piszczatowska, 2016).  Uncertainty over legal form for CE, which Polish government is looking to address, has limited its development. Government is looking to promote “energy clusters” (Przemycka 2018), a contract between different units (individuals, legal persons, business entities, research entities and local municipalities), for the purpose of energy generation, balancing, trade or distribution.  However, these must obtain government approval (so far 33 such initiatives have been approved) and most energy clusters seem to have been established either by the local authorities or the business sector. The energy clusters in which citizens actively take part are scarce. | Energy cluster |
| Spain | Sector dominated by large companies. Massive expansion of RE in Spain since the 1990s driven entirely by large companies.  Cooperatives, e.g. Som energia, Zencer, GoiEner, some generation capability, but mostly resale of green electricity. Transition movements (platforms), and networks, some (very small-scale) self-sufficiency. One community owned wind turbine (Viure de L’Aire 2018). | Cooperative, platform, network |
| Sweden | CE uncommon prior to 1980s, despite long tradition and influence of associations generally.  RE transition seen as “centralized and technocratic” with no political discussion about CE (Wizelius 2018). Nevertheless, CE initiatives are the main driver for wind power developments – typically small to medium sized wind farms in cooperative ownership (around 80), following the Danish model. Wizelius (2018) notes as much as 40-50% wind power is community owned, but that the sector has been in crisis after 2015.  Fewer solar PV cooperatives and small-scale district heating producers (<10) (data from this study and Kooij et al., 2018). Ecovillages and housing associations have some very small-scale projects. Some small-scale farmers’ bioenergy enterprises. | Ekonomiska förening (Cooperatives) or Samfällighetsförening (Associations) ecovillages, housing associations.  Ecoby (ecovillage) |
| UK | The United Kingdom is not a forerunner in community energy, with large energy companies traditionally very dominant (Toke et al 2008). However, after a late start, much progress has been made in the last 10 years.  CE in the UK originated in social movements that arose during the 1960s and 70s. Following early developments (e.g. Baywind in 1997) community energy projects progressed slowly but rapidly accelerated following introduction of Feed-in-Tariff (FIT) and Renewable Heat Incentive (RHI) in 2010. CE is very diverse in the UK, with no single dominant type or organization model. UK has wind cooperatives, solar parks and small hydro schemes as well as many locally-based energy transition initiatives, e.g. Transition Towns. In general, experimentation and innovation in energy arises from these movements, not from the larger cooperatives, which are often oriented more towards maximizing revenue than sustainability concerns.  England lacks policy support, Wales supported to some degree, Scotland well-supported. UK is, however, home to one significant innovation that is not generally present elsewhere – the Community Development Trust or CDT. | Cooperative/community benefit society (Registered Society or Industrial and Provident Society)  Community Development Trust/Company (Private Limited Company without share capital) |

# Sampled CE initiatives in Belgium

| **No** | **Description** | **lat** | **lon** | **Type** | **organisation type** | **Web Address** |
| --- | --- | --- | --- | --- | --- | --- |
| 1 | Beauvent | 51.04 | 2.65 | Solar/Wind | CVBA (Cooperative Limited Liability Company) | <https://www.beauvent.be/projecten> |
| 2 | Wase Wind | 51.22 | 4.13 | Wind | CVBA (Cooperative Limited Liability Company) | <https://www.wasewind.be/over-wase-wind/onze-windparken> |
| 3 | Champs D'Energie | 50.59 | 5.00 | Wind/Solar/Biomass | SCRL (Cooperative Limited Liability Company) | <http://www.champsdenergie.be/> |
| 4 | Coopérative Leuzoise pour les Energies du Futur | 50.59 | 3.38 | Wind | SCRL (Cooperative Limited Liability Company) | <http://www.clef-scrl.be/> |
| 5 | Condroz Energies Citoyennes | 50.93 | 5.33 | Solar/Wind | SCRL (Cooperative Limited Liability Company) | <http://www.bronsgroen.be/> |
| 6 | Emissions Zero | 50.94 | 4.04 | Solar/Wind/Biomass/Hydroelectricity | SCRL (Cooperative Limited Liability Company) | <https://www.emissions-zero.coop/page/photovoltaique> |
| 7 | Coopeos | 50.66 | 4.60 | Biomass | SCRL (Cooperative Limited Liability Company) | [coopeos.be](http://coopeos.be/) |
| 8 | Courant D'Air | 50.46 | 6.22 | Solar/Wind | SCRL (Cooperative Limited Liability Company) | <https://www.courantdair.be/wp/production-denergie/> |
| 9 | (Alerte sa Souffle) Vents Houyet | 50.63 | 4.50 | Wind | SCA FS (Partnership Limited by shares with a social aim) | <http://www.vents-houyet.be/> |
| 10 | Ferreole | 50.40 | 5.62 | Solar/Wind | SCRL (Cooperative Limited Liability Company) | <http://www.ferreole.be/les-projets-2/> |
| 11 | HesbEnergie | 50.69 | 4.98 | Wind | SCRLFS (Cooperative Limited Liability Company with a Social Aim) | [http://www.hesbenergie.be](http://www.hesbenergie.be/) |
| 12 | Ecopower | 51.20 | 4.43 | Wind/Solar/Hydroelectricity | CVBA (Cooperative Limited Liability Company) | <https://www.ecopower.be/> |
| 13 | Nosse Moulin | 50.59 | 4.63 | Wind | SCRLFS (Cooperative Limited Liability Company with a Social Aim) | <http://www.nossemoulin.org/> |
| 14 | Vents du Sud | 49.68 | 5.83 | Wind | SCRLFS (Cooperative Limited Liability Company with a Social Aim) | <https://ventsdusud.be/projet/projet-vds> |
| 15 | Luceole | 49.77 | 5.62 | Wind | SCRL (Cooperative Limited Liability Company) | <http://www.luceole.be/> |
| 16 | Denderstroom | 51.20 | 4.43 | Solar | CVBA (cooperative company with limited liability) | [denderstroom.be](http://denderstroom.be/) |
| 17 | PajoPowoer CVBA | 50.79 | 4.11 | Solar | SCRLFS (Cooperative Limited Liability Company with a Social Aim) | <https://cvba.pajopower.be/> |
| 18 | RESCoop Belgium | 51.20 | 4.43 | Solar/Wind/Biomass/Hydroelectricity | federation of groups and cooperative | [REScoop.be](http://rescoop.be/) |
| 19 | Moulins Du Haute Pays | 50.40 | 3.77 | Wind | SCRL (Cooperative Limited Liability Company) | <http://www.moulinsduhautpays.be/> |
| 20 | ENERGIRIS scrl | 50.83 | 4.40 | Solar/Thermal | SCRL (Cooperative Limited Liability Company) | <http://energiris.coop/> |
| 21 | Allons le Vent | 50.09 | 4.93 | Solar/Wind/Biomass | SCRL (Cooperative Limited Liability Company) | <http://allonsenvent.be/> |

# Sampled CE initiatives in France

| **No** | **Descrip** | **lat** | **lon** | **energy type** | **organisation type** | **Web address** |
| --- | --- | --- | --- | --- | --- | --- |
| 1 | Les Ailes des Cretes | 49.58 | 4.66 | Wind | SAS (Société par Actions Simplifiées) = Limited Liability Company | <https://energie-partagee.org/projets/les-ailes-des-cretes/> |
| 2 | HydroRoan | 48.41 | 6.84 | Hydroelectric | SAS (Société par Actions Simplifiées) = Limited Liability Company | <https://energie-partagee.org/projets/hydroraon/> |
| 3 | OnCIME | 47.75 | -3.37 | Solar | Website | <http://www.wiki.energie-partagee.org/wakka.php?wiki=ProjetS2&vue=consulter&action=recherche&q=onc&id=&facette=> |
| 4 | Bretagne Énergies Citoyennes | 47.75 | -3.36 | Solar | SAS (Société par Actions Simplifiées) = Limited Liability Company | <http://www.bretagne-energies-citoyennes.org/> |
| 5 | Taranis | 47.65 | -2.09 | Multiple | Network of initiatives supported by the association Energies citoyennes en Pays de Vilaine | <http://reseau-taranis.fr/> |
| 6 | Eolienne en Pays de Villaine | 47.67 | -2.07 | Wind | Association | <https://www.eolien-citoyen.fr/nous-connaitre/quisommesnous.html> |
| 7 | ISAC WATTS | 47.32 | -2.05 | Wind | SAS (Société par Actions Simplifiées) = Limited Liability Company | <https://isacwatts.wordpress.com/> |
| 8 | Brocéliande Energie Locale - Parc éolien de Plélan le grand | 48.00 | -2.05 | Wind | SAS (Société par Actions Simplifiées) = Limited Liability Company | <https://www.societe.com/societe/broceliande-energies-locales-479505877.html> |
| 9 | SAS Soleil du Grand Ouest | 48.19 | -1.73 | Solar | SAS (Société par Actions Simplifiées) = Limited Liability Company | <https://energie-partagee.org/projets/soleil-du-grand-ouest/> |
| 10 | Solidaires pour les Energies Renouvables | 48.03 | -1.72 | Solar | Association + SAS (Société par Actions Simplifiées) = Limited Liability Company | <http://www.reseau-taranis.fr/les-projets-du-reseau/73-la-garenne-solaire> |
| 11 | St Brieuc Agglo - Hippodrome | 48.51 | -2.84 | Solar | Regional networks | <http://energie-partagee.org/nous-decouvrir/les-reseaux-regionaux/> |
| 12 | Toit Solaire de Parthenay Energies Citoyennes | 48.19 | -1.83 | Solar | SAS (Société par Actions Simplifiées) = Limited Liability Company | [http://www.reseau-taranis.fr/%5C%22index.php?option=com_sobipro&sid=106\%22](http://www.reseau-taranis.fr/%5C%22index.php?option=com_sobipro&sid=106%5C%22) |
| 13 | Zusamme Solar Colmar | 48.08 | 7.35 | Solar | Société coopérative d’énergie: Cooperative energy society | <https://je-souscris.energie-partagee.org/decouvrir-nos-projets/detail/zusamme-solar-colmar> |
| 14 | La Limouzinière | 46.99 | -1.60 | Wind | Not clear | <https://www.elise85.fr/domaines-d-activites/energies-renouvelables-citoyennes/projet-de-la-limouziniere-44/> |
| 15 | Atout vent en Chemillois | 47.12 | -0.79 | Wind | SAS La Jacterie | <http://atoutventenchemillois.fr/> |
| 16 | SCIC Mayenne Bois Energie | 48.32 | -0.65 | Biomass (wood) | SCIC (Société Coopérative d'Intéret Collectif) = Cooperative Society of Collective Interest | <http://www.hautemayenne.org/reseau/bois-energie.htm> |
| 17 | Tener'IF | 48.89 | 2.36 | Solar | Partnership between a SEM (Société d'économie Mixte) = public private partnership and Energie Partagée | <https://je-souscris.energie-partagee.org/decouvrir-nos-projets/detail/tenerif> |
| 18 | Parc éolien de la chapelle montreuil | 46.54 | 0.11 | Wind | Public/private partnership | <https://je-souscris.energie-partagee.org/decouvrir-nos-projets/detail/champs-chagnots> |
| 19 | Éolienne La Citoyenne - EOLE87 | 45.65 | 1.12 | Wind | Website | <http://www.wiki.energie-partagee.org/wakka.php?wiki=EolienneLaCitoyenneEole873> |
| 20 | La Société d'Economie Mixte Energies Renouvelables 36 des Tilleuls | 46.98 | 2.08 | Wind | SEM (Société d'économie Mixte) = public private partnership | <https://energie-partagee.org/projets/le-parc-des-tilleuls/> |
| 21 | Energie Citoyen en Touraine | 47.42 | 0.71 | Solar | Association | [http://www.energiecitoyenneentouraine.fr](http://www.energiecitoyenneentouraine.fr/) |
| 22 | Ségala Agriculture Énergie Solaire | 44.05 | 2.16 | Solar, Wind, Biomass | Société Coopérative d’Intérêt Collectif Bois Énergie: Cooperative Society of Collective Interest Wood energy | <http://sicaseli.fr/> |
| 23 | HydroEpinal | 48.17 | 6.45 | Hydroelectric | Partnership between Ercisol (Cooperative Society) and Energie Partagée (Association) | <https://je-souscris.energie-partagee.org/decouvrir-nos-projets/detail/hydroepinal/> |
| 24 | Ferme d'Escoums | 42.53 | 2.28 | Solar | SCIC and SAS with Variable Capital | <http://www.fermedescoums.fr/> |
| 25 | SCIC SARL catEnR | 42.70 | 2.88 | Solar | Société Coopérative d'Intéret Collectif = Cooperative Society of Collective Interest | [http://catenr.org](http://catenr.org/) |
| 26 | SCIC Conflent Energie | 42.62 | 2.42 | Solar | Société Coopérative d'Intéret Collectif = Cooperative Society of Collective Interest | <http://conflentenergie.free.fr/> |
| 27 | SAS Lum Del Larzac | 44.12 | 3.22 | Solar | SAS (Société par Actions Simplifiées) = Limited Liability Company | <http://larzac.org/SAS-Lum-del-Larzac> |
| 28 | Plaine Sud Energie | 49.13 | -0.31 | Solar | Société Coopérative d'Intérêt Collectif à responsabilité limitée à capital variable = Cooperative Society with Collective Interest Company with limited liability and variable capital | <http://plainesudenergies.blogspot.com/> |
| 29 | ENERCOSO (Energies Coopératives du Sommiérois) | 43.78 | 4.09 | Solar | SAS - Société par actions simplifiée coopérative à capital variable = Company with limited liability and cooperative with variable capital | <http://www.enercoso.fr/> |
| 30 | SAS Cévennes Durables | 44.28 | 3.84 | Solar | SAS (Société par Actions Simplifiées) = Limited Liability Company | <http://cevennes-durables.fr/> |
| 31 | Voilà L'Soleil | 44.31 | 4.35 | Solar | SAS (Société par Actions Simplifiées) = Limited Liability Company | <http://www.midilibre.fr/2015/10/16/inauguration-du-toit-solaire-a-la-grange-des-pres,1228174.php> |
| 32 | Ouvèze Payre Energie | 44.74 | 4.60 | Solar | SAS (Société par Actions Simplifiées) = Limited Liability Company | <http://ouveze-payre-energies.fr/> |
| 33 | Aurance Energie | 44.90 | 4.47 | Solar | SAS (Société par Actions Simplifiées) = Limited Liability Company | <http://aurance-energies.fr/> |
| 34 | Centrales Villageoises du Val d'Eyrieux | 44.83 | 4.66 | Solar | Local Societies (registered trademark for societies with a focus on local develpment) with either a SAS or SCIC status | <http://www.centralesvillageoises.fr/web/guest/accueil;jsessionid=93AC6F2289A31AEFA3E3EA913DD81F30> |
| 35 | Giraud Agri Energie | 45.68 | 4.30 | Solar | Individual farm | <https://energie-partagee.org/projets/giraud-agri-energie/> |
| 36 | Centrales Villageoises Gervanne Raye | 44.81 | 5.16 | Solar | Local Societies (registered trademark for societies with a focus on local develpment) with either a SAS or SCIC status | <http://www.centralesvillageoises.fr/web/guest/accueil;jsessionid=93AC6F2289A31AEFA3E3EA913DD81F30> |
| 37 | Begawatts | 47.60 | -2.24 | Wind | Project at the origin of Energies Partagées | <https://energie-partagee.org/projets/begawatts/#en-savoir-plus> |
| 38 | Centrales Villageoises Rosannaises | 44.39 | 5.47 | Solar | Local Societies (registered trademark for societies with a focus on local develpment) with either a SAS or SCIC status | [http://centralesvillageoises.fr/web/guest/actus_rosanais et http://www.rosansoleil.fr/](http://centralesvillageoises.fr/web/guest/actus_rosanais%20et%20http:/www.rosansoleil.fr/) |
| 39 | Centrales Villageoises Sud Baronnies | 44.28 | 5.26 | Solar | Local Societies (registered trademark for societies with a focus on local develpment) with either a SAS or SCIC status | <http://www.centralesvillageoises.fr/web/guest/actussudbaronnies> |
| 40 | Centrales Villageoises Lure Albion | 44.04 | 5.63 | Solar | Local Societies (registered trademark for societies with a focus on local develpment) with either a SAS or SCIC status | [http://lurealbion@centralesvillageoises.fr/](http://centralesvillageoises.fr/) |
| 41 | LUCISOL | 43.88 | 5.40 | Solar | SAS (Société par Actions Simplifiées) = Limited Liability Company | <http://lucisol.fr/> |
| 42 | Centrales Villageoises du Pays d'Aigues | 43.73 | 5.55 | Solar | Local Societies (registered trademark for societies with a focus on local develpment) with either a SAS or SCIC status | <http://centralesvillageoises.fr/web/guest/actussudluberon> |
| 43 | Energ'Ethique04 | 44.06 | 6.18 | Solar | Société Coopérative d’Intérêt Collectif = Cooperative Society with Collective Interest | <http://www.ener04.com/> |
| 44 | Energies Collectives | 44.56 | 6.50 | Solar | Société Coopérative d’Intérêt Collectif = Cooperative Society with Collective Interest | [http://www.energiescollectives.fr](http://www.energiescollectives.fr/) |
| 45 | Centrales Villageoises Ener'Guil | 44.66 | 6.65 | Solar | Local Societies (registered trademark for societies with a focus on local develpment) with either a SAS or SCIC status | [http://ener-guil.blog4ever.com/articles](http://ener-guil.blog4ever.com/articles%20et%20http:/centralesvillageoises.fr/web/guest/actusqueyras) |
| 46 | Soleil Eau Vent Energie | 44.90 | 6.64 | Solar | SEM (Société d'économie Mixte) = public private partnership | <https://energie-partagee.org/projets/seve/> |
| 47 | Buxia Energie | 45.34 | 5.62 | Solar | SAS with variable capital | <http://www.buxia-energies.fr/> |
| 48 | Pic Bois / Energie Partagée | 45.64 | 5.63 | Solar | Société en commandite par actions (not sure what it means…) | <https://energie-partagee.org/projets/pic-bois/> |
| 49 | Centrales Villageoises Perle | 45.53 | 6.05 | Solar | Local Societies (registered trademark for societies with a focus on local develpment) with either a SAS or SCIC status | <http://www.centralesvillageoises.fr/web/guest/juridique-plateau-de-la-leysse> |
| 50 | Centale Villageoises de Quatres Montagnes | 45.14 | 5.52 | Solar | Local Societies (registered trademark for societies with a focus on local develpment) with either a SAS or SCIC status | <http://www.centralesvillageoises.fr/web/guest/technique-quatre-montagnes-vercors> |
| 51 | Méthadoux | 46.21 | -1.02 | Biogas | SAS (Société par Actions Simplifiées) = Limited Liability Company | http://www.methadoux.fr/ |

# Sampled CE initiatives in Germany

| **No** | **Description** | **lat** | **lon** | **energy type** | **organisation type** | **Web address** |
| --- | --- | --- | --- | --- | --- | --- |
| 1 | Bürgergenossenschaft BWO-Energie eG | 47.96 | 9.35 | Heating, biogas | Cooperative | http://bwo-energie.de |
| 2 | BürgerEnergiegenossenschaft Kurpfalz eG | 49.38 | 8.59 | Solar | Cooperative | [www.buergerenergie-kurpfalz.de](http://www.buergerenergie-kurpfalz.de/) |
| 3 | HEG Heidelberger Energiegenossenschaften eG | 49.40 | 8.67 | Solar, wind | Cooperative | www.heidelberger-energiegenossenschaft.de |
| 4 | Genossenschaften der BürgerEnergie Tauberfranken | 49.63 | 9.66 | Solar | Cooperative | https://www.bürgerenergie-tauberfranken.de |
| 5 | BEA BürgerEnergie Aschaffenburg eG | 49.98 | 9.14 | Solar | Cooperative | http://www.bea-aschaffenburg.de |
| 6 | Bürgerenergie Bachgau eG | 49.92 | 9.07 | Solar | Cooperative | http://www.buergerenergie-bachgau.de/ |
| 7 | Nahwärme Gössenheim eG | 50.02 | 9.78 | Biomass | Cooperative | http://www.nahwärme-gössenheim-eg.de |
| 8 | GenoEnergie Karlstadt eG | 49.97 | 9.76 | Solar | Cooperative | http://www.genoenergie-karlstadt.de/seite/de/energie/02/WB/Herzlich_Willkommen.html |
| 9 | Bürger Energie Berlin eG | 52.50 | 13.43 | Solar, wind | Cooperative | <https://www.buerger-energie-berlin.de/> |
| 10 | EGBB Energiegenossenschaft Berlin-Brandenburg eG | 52.49 | 13.30 | Solar, wind | Cooperative | <https://www.energiegenossenschaften-gruenden.de/> |
| 11 | DEC Deutsche Energie Contracting eG | 52.56 | 13.38 | Only contracting | Cooperative | https://www.energiegenossenschaften-gruenden.de/energiegenossenschaften-und-projektentwickler-suchen/detail.html?tx_egg_pi1%5Baction%5D=detail&tx_egg_pi1%5Benergy_association%5D=584&tx_egg_pi1%5Bregion%5D=82&tx_egg_pi1%5BsearchGs%5D=on&cHash=88634b10499f464747436063b5e2be1d |
| 12 | SoGeLa Solargenossenschaft Lausitz eG | 51.95 | 14.70 | Solar | Cooperative | [http://www.solar-lausitz.de](http://www.solar-lausitz.de/) |
| 13 | Neue Energie Genossenschaft eG | 52.39 | 13.10 | Solar | Cooperative | https://www.genossenschaften.de/neue-energie-genossenschaft-eg-potsdam |
| 14 | Rehfelde-EigenEnergie eG | 52.53 | 13.91 | Solar, wind | Cooperative | http://rehfelde-eigenenergie.de |
| 15 | Energiegenossenschaft Breydin eG | 52.77 | 13.84 | Wind | Cooperative | https://www.energiegenossenschaften-gruenden.de/energiegenossenschaften-und-projektentwickler-suchen/detail.html?tx_egg_pi1%5Baction%5D=detail&tx_egg_pi1%5Benergy_association%5D=911&tx_egg_pi1%5Bregion%5D=83&tx_egg_pi1%5BsearchGs%5D=on&cHash=6e966becd825b7de785b42a1bac4cdfb |
| 16 | Bremer Energiehaus-Genossenschaft eG | 53.08 | 8.80 | Solar | Cooperative | https://www.benergie.de |
| 17 | solar popular eG | 53.08 | 8.82 | Solar | Cooperative | https://www.energiegenossenschaften-gruenden.de/energiegenossenschaften-und-projektentwickler-suchen/detail.html?tx_egg_pi1%5Baction%5D=detail&tx_egg_pi1%5Benergy_association%5D=914&tx_egg_pi1%5Bregion%5D=84&tx_egg_pi1%5BsearchGs%5D=on&cHash=bf73a9c2750c476907fe3552f3946696 |
| 18 | Bürger Energie Bremen eG | 53.10 | 8.81 | Solar, wind | Cooperative | [http://www.begeno.de/](http://http/www.begeno.de/) |
| 19 | Uni Bremen SOLAR | 53.10 | 8.86 | Solar | Cooperative | https://www.uni-bremen.de/unibremensolar.html |
| 20 | Greenpeace Energy eG | 53.56 | 9.97 | Solar, wind | Cooperative | https://www.greenpeace-energy.de/privatkunden.html |
| 21 | Energienetz Hamburg eG | 53.63 | 10.01 | Solar | Cooperative | http://www.energienetz-hamburg.de |
| 22 | Bürger Energie Kassel & Söhre eG. | 51.31 | 9.48 | Solar, wind | Cooperative | www.be-kassel.de |
| 23 | EnergieGenossenschaft KaufungerWald eG | 51.28 | 9.62 | Solar | Cooperative | [http://www.energiegenossenschaft-kaufungen.de](http://www.energiegenossenschaft-kaufungen.de/) |
| 24 | Bürgerenergie Untermain eG | 50.01 | 8.45 | Solar | Cooperative | http://www.buergerenergie-untermain.de |
| 25 | SolarInvest Main-Taunus eG | 50.08 | 8.44 | Solar | Cooperative | https://www.solarinvest-main-taunus.de |
| 26 | Norddeutsche Energiegemeinschaft eG | 53.80 | 11.71 | Solar, wind | Cooperative | [http://www.n-eg.de](http://www.n-eg.de/) |
| 27 | Biogaserzeugungsgenossenschaft Testorf-Steinfort eG | 53.78 | 11.26 | Biogas | Cooperative | https://www.energiegenossenschaften-gruenden.de/energiegenossenschaften-und-projektentwickler-suchen/detail.html?tx_egg_pi1%5Baction%5D=detail&tx_egg_pi1%5Benergy_association%5D=619&tx_egg_pi1%5Bregion%5D=87&tx_egg_pi1%5BsearchGs%5D=on&cHash=b5013a91742bd9b855912a4688187165 |
| 28 | Bürger-Solarkraftwerke Rosengarten eG | 53.40 | 9.90 | Solar | Cooperative | https://www.buergersolarkraftwerke-rosengarten.de |
| 29 | Energiegenossenschaft Elbe Heide eG | 53.36 | 10.21 | Solar | Cooperative | http://elbeheide.de |
| 30 | Energiegenossenschaft Emstal eG | 52.86 | 7.32 | Biomass | Cooperative | http://energie-emstal.de |
| 31 | Energiequelle Neuenkirchen-Vörden eG | 52.50 | 8.09 | Solar | Cooperative | [http://www.energiequelle-nv.de](http://www.energiequelle-nv.de/) |
| 32 | Friedensfördernden Energiegenossenschaft Herford eG (FEGH) | 52.10 | 8.59 | Solar, heating | Cooperative | https://www.fegh.de/home/ |
| 33 | Energie-für-uns eG | 52.31 | 8.63 | Solar, biogas | Cooperative | [http://www.energie-fuer-uns.de](http://www.energie-fuer-uns.de/) |
| 34 | OWL Neue Energien (Bürgergenossenschaft) eG- | 52.31 | 8.49 | Solar, wind | Cooperative | http://www.owlne.de/energiepark-leteln.html |
| 35 | Bürgerenergie Kahler Asten eG | 51.23 | 8.50 | Solar | Cooperative | [http://www.buergerenergie-kahler-asten.de](http://www.buergerenergie-kahler-asten.de/) |
| 36 | Rüthener Bürgerenergie eG | 51.53 | 8.43 | Solar | Cooperative | http://www.ruethener-buergerenergie.de |
| 37 | TRENEG Trierer Energiegenossenschaft eG | 49.77 | 6.68 | Solar | Cooperative | http://www.treneg-trier.de |
| 38 | eegon - Eifel Energiegenossenschaft eG | 50.31 | 6.70 | Solar | Cooperative | https://www.eegon.de/projekte.html |
| 39 | Solar-Bürger-Genossenschaft eG | 49.02 | 8.16 | Solar | Cooperative | https://www.solarbuergergenossenschaft.de |
| 40 | Bürgerenergie Ludwigshafen eG | 49.50 | 8.42 | Solar | Cooperative | <http://www.buergerenergie-ludwigshafen.de/> |
| 41 | Bürger-Energie-Genossenschaft Köllertal eG | 49.28 | 6.88 | Solar | Cooperative | [http://www.beg-koellertal.de](http://www.beg-koellertal.de/) |
| 42 | Energiegenossenschaft Fürth eG | 49.42 | 7.24 | Biogas | Cooperative | [https://nahwaerme-fuerth.jimdo.com](https://nahwaerme-fuerth.jimdo.com/) |
| 43 | BürgerEnergieEppelborn eG (BEE) | 49.41 | 6.96 | Solar, wind | Cooperative | <http://buergerenergieeppelborn.com/> |
| 44 | BürgerEnergieGenossenschaft Hochwald e.G. | 49.51 | 6.75 | Solar, wind | Cooperative | ww.beg-hochwald.de |
| 45 | Energiegenossenschaft Neue Energien Ostsachsen eG (NEOS) | 51.05 | 13.74 | Solar, wind | Cooperative | [www.egneos.de](http://www.egneos.de/) |
| 46 | Energiegenossenschaft Leipzig EGL eG | 51.34 | 12.34 | Solar | Cooperative | <https://www.energiegenossenschaft-leipzig.de/> |
| 47 | Bürger Energie Drebach eG | 50.68 | 13.02 | Solar | Cooperative | [https://www.buerger-energie-drebach.de](https://www.buerger-energie-drebach.de/) |
| 48 | Energiegenossenschaft Chemnitz-Zwickau eG | 50.84 | 12.92 | Solar | Cooperative | <https://hier-bewege-ich-was.de/> |
| 49 | proVoltic Bürgerkraftwerke eG | 51.11 | 11.83 | Solar | Cooperative | [www.provoltic.de](http://www.provoltic.de/) |
| 50 | Gas- und Energiegenossenschaft Ost- und Mitteldeutschland eG (GEG) | 51.73 | 12.35 | Solar | Cooperative | http://www.energiegenossenschaft.de |
| 51 | Energie-Genossenschaft Altmark eG | 52.60 | 11.85 | Solar | Cooperative | http://www.energiegenossenschaftaltmark.de |
| 52 | Helionat eG | 52.14 | 11.65 | Solar | Cooperative | [http://www.helionat.de](http://www.helionat.de/) |
| 53 | BürgerEnergie Lübeck eG i.G. | 53.87 | 11.65 | Hydropower | Cooperative | <https://www.buergerenergie-luebeck.de/> |
| 54 | BÜRGERSOLAR Neustadt in Holstein eG | 54.10 | 10.82 | Solar | Cooperative | [http://www.buergersolar-neustadt.de](http://www.buergersolar-neustadt.de/) |
| 55 | Sonnenkraftwerk Henstedt-Ulzburg | 53.78 | 10.04 | Solar | Cooperative | [http://www.sonnenkraftwerk-hu.de](http://www.sonnenkraftwerk-hu.de/) |
| 56 | Energieversorgung Honigsee eG | 54.23 | 10.19 | Biogas | Cooperative | http://www.energieversorgung-honigsee.de |
| 57 | Energiegenossenschaft Ostthüringen eG | 50.90 | 12.36 | Solar | Cooperative | [https://www.eng-o.de](https://www.eng-o.de/) |
| 58 | BürgerEnergie Saale-Holzland eG i.G. | 50.98 | 11.98 | Solar | Cooperative | [http://www.buergerenergie-saale-holzland.de](http://www.buergerenergie-saale-holzland.de/) |
| 59 | Bioenergiedorf Schlöben eG | 50.89 | 11.69 | Biomass and Biogas | Cooperative | https://bioenergiedorf.schloeben.de/bioenergiedorf/ |
| 60 | BürgerEnergie Jena eG | 50.93 | 11.61 |  | Cooperative | www.buergerenergie-jena.de |

# Sampled CE initiatives in Italy

| **ID** | **name** | **lat** | **lon** | **type** | **organisation type** | **Web address** |
| --- | --- | --- | --- | --- | --- | --- |
| 1 | Consorzio Elettrico Industriale Stenico | 46.04 | 10.87 | hydro | Società cooperativa | <https://www.ceis-stenico.it/ceis-stenico/struttura.html> |
| 2 | Consorzio Elettrico di Storo | 45.85 | 10.58 | hydro, solar | Società cooperativa | <http://www.cedis.info/servizi/energia-elettrica/idroelettrico/> |
| 3 | Retenergie | 44.77 | 7.68 | photovoltaic | Società cooperativa | <http://www.retenergie.it/cooperativa/> |
| 4 | Societa cooperativa elettrica Gignod | 45.74 | 7.35 | hydro | Società cooperativa | <http://www.ceg-energia.it/homepage.asp?l=1> |
| 5 | ProColloro | 46.00 | 8.33 | hydro | Società cooperativa | <http://www.procolloro.it/> |
| 6 | Granara Villaggio Ecologico | 44.56 | 9.89 | solar | Ecovillaggio | <https://www.granara.org/> |
| 7 | Società Elettrica di Morbegno | 46.13 | 9.57 | hydro | Società cooperativa | <https://www.sem-morbegno.it/home.html> |
| 8 | Società per L'illuminazione Elettrica in Chiavenna | 46.32 | 9.40 | hydro | società cooperativa chiedere produzione | <http://www.siec-chiavenna.it/> |
| 9 | Azienda Energetica Prato Soc. Coop. | 46.81 | 10.60 | hydro, solar | Società cooperativa | <http://www.e-werk-prad.it/it/> |
| 10 | Schludernser Energiegenossenschaft | 46.67 | 10.58 | solar, biogas | Società cooperativa | <http://www.seg.bz.it/stromproduktion/orc-schluderns-taufers.html> |
| 11 | Fernheizkraftwerk Toblach-Innichen | 46.72 | 12.23 | biomass | Società cooperativa | <http://www.fti.bz/it/?x=%28%29> |
| 12 | Comunita' Cooperativa Melpignano | 40.15 | 18.29 | solar | Società cooperativa | <http://www.coopcomunitamelpignano.it/> |
| 13 | Energie Villnoess | 46.64 | 11.69 | hydro, biodiesel | Società cooperativa | <http://www.energie-villnoess.it/index.php?id=2&L=1> |
| 14 | SECAB societa elettrica cooperativa | 46.53 | 13.02 | hydro | Società cooperativa | <https://www.secab.it/home/> |
| 15 | Forli citta solare (Partecipata) | 44.22 | 12.04 | solar | Società a responsabilità limitata | <http://www.comune.forli.fc.it/servizi/menu/dinamica.aspx?idArea=71400&idCat=71408&ID=71409> |
| 16 | Parco Eolico di Rivoli Veronese | 45.57 | 10.81 | wind | Società per azioni | <https://www.comune.rivoli.vr.it/c023062/images/cantiereolico/Impianto%20eolico%20Monte%20Mesa.pdf> |
| 17 | WeForGreen | 45.41 | 10.97 | solar | Società cooperativa | <http://www.weforgreen.it/> |
| 18 | So.ge.nu.s Spa | 43.52 | 13.14 | Biogas | Società per azioni | <https://www.sogenus.com/> |
| 19 | E'Nostra | 45.48 | 9.23 | Mixed | Società cooperativa | <https://www.enostra.it/> |
| 20 | Energia Positiva | 44.98 | 7.64 | Mixed | Società cooperativa | <https://www.energia-positiva.it/> |
| 21 | Energie Umwelt Moos Genossenschaft | 46.83 | 11.18 | Hydro | Società cooperativa | <http://www.eum-genmbh.com/de/index/1-0.html> |
| 22 | Flora Toscana | 43.87 | 10.69 | Solar | Società cooperativa | <https://www.floratoscana.it/home/> |

# Sampled CE initiatives in Poland

| **ID** | **name** | **lat** | **lon** | **type** | **organisation type** | **Web address** |
| --- | --- | --- | --- | --- | --- | --- |
| 1 | Spółdzielnia Nasza Energia | 50.72 | 23.25 | biogas | spółdzielnia energetyczna | No website |
| 2 | Białogardzki Klaster Energii | 54.01 | 15.91 | various | klaster energii | http://bke.energy/ |
| 3 | Energetyczny Klaster Oławski | 50.95 | 17.29 | various | klaster energii | recently created, no website yet, no further information, suppored by the central governement, but unclear funding |
| 4 | Karkonoski Klaster Energii | 50.78 | 15.76 | various | klaster energii | https://www.teraz-srodowisko.pl/produkty-uslugi/produkty/zgorzelecki-klaster-rozwoju-odnawialnych-zrodel-energii-i-efektywnosci-energetycznej-117.html |
| 5 | Siemiatycki Klaster Energii | 52.42 | 22.84 | biomass | klaster energii | recently created, no website yet, no further information, suppoted by the central governement, but unclear funding |
| 6 | Baligrodzki Klaster Energii Odnawialnej | 49.34 | 22.27 | biomass | klaster energii | recently created, no website yet, no further information, suppoted by the central governement, but unclear funding |
| 7 | Klaster Energii "Powiatu Przysuskiego" | 51.43 | 20.37 | no information | klaster energii | recently created, no website yet, no further information, suppoted by the central governement, but unclear funding |
| 8 | Klaster Energii Południowe Podlasie | unclear exact location | | no information | klaster energii | recently created, no website yet, no further information, suppoted by the central governement, but unclear funding |
| 9 | Kwidzyński Klaster Energii | 53.72 | 18.81 | no information | klaster energii | recently created, no website yet, no further information, suppoted by the central governement, but unclear funding |
| 10 | Południowo-Zachodni Klaster Energii | 51.15 | 14.98 | no information | klaster energii | https://www.facebook.com/Po%C5%82udniowo-Zachodni-Klaster-Energii-247392992450659/ |
| 11 | Przechlewski Klaster Energii | 53.97 | 16.68 | no information | klaster energii | recently created, no website yet, no further information, suppoted by the central governement, but unclear funding |
| 12 | Ryterski Mikroklaster Energii Odnawialnej | unclear exact location | | no information | klaster energii | recently created, no website yet, no further information, suppoted by the central governement, but unclear funding |
| 13 | Siedlecki Klaster Energii (Lider Gmina Kotuń) | 52.61 | 18.28 | no information | klaster energii | recently created, no website yet, no further information, suppoted by the central governement, but unclear funding |
| 14 | Siedlecki Klaster Energii (Lider Miasto Siedlce) | 52.16 | 22.24 | no information | klaster energii | recently created, no website yet, no further information, suppoted by the central governement, but unclear funding |
| 15 | Sochaczewski Klaster Energii | 52.24 | 20.25 | geothermal | klaster energii | recently created, no website yet, no further information, suppoted by the central governement, but unclear funding |
| 16 | Wieniawski Klaster Energii Odnawialnej | 51.30 | 20.81 | no information | klaster energii | recently created, no website yet, no further information, suppoted by the central governement, but unclear funding |
| 17 | Zgorzelecki Klaster Rozwoju Odnawialnych Źródeł Energii i efektywności Energetycznej | 51.15 | 15.01 | various | klaster energii | recently created, no website yet, no further information, suppored by the central governement, but unclear funding |
| 18 | Klaster Energia Dolina Zielawy | 51.85 | 23.18 | various | klaster energii | recently created, no website yet, no further information, suppored by the central governement, but unclear funding |
| 19 | KLASTER ENERGII EKOLOGIA I EFEKTYWNOŚĆ ENERGETYCZNA – „3E NOWY TARG” | 49.48 | 20.03 | various | klaster energii | recently created, no website yet, no further information, suppored by the central governement, but unclear funding |
| 20 | Klaster Energii Serce Podhala | 49.43 | 20.03 | various | klaster energii | recently created, no website yet, no further information, suppored by the central governement, but unclear funding |
| 21 | Klaster Energii Zbiornika Czorsztyńskiego | 49.41 | 20.30 | various | klaster energii | http://www.klaster1.com/ |
| 22 | Tarnowski Klaster Energii | 50.01 | 20.99 | various | klaster energii | recently created, no website yet, no further information, suppored by the central governement, but unclear funding |
| 23 | Wirtualna Zielona Elektrownia Ochotnica | 49.52 | 20.32 | various | klaster energii | recently created, no website yet, no further information, suppored by the central governement, but unclear funding |
| 24 | energyREGION Michałowo | 52.99 | 23.68 | no information | klaster energii | recently created, no website yet, no further information, suppored by the central governement, but unclear funding |
| 25 | Klaster Energii "Żywiecka Energia Przyszłości" | 49.69 | 19.18 | no information | klaster energii | recently created, no website yet, no further information, suppored by the central governement, but unclear funding |
| 26 | Słupski Klaster Bioenergetyczny | 54.46 | 17.03 | various | klaster energii | recently created, no website yet, no further information, suppored by the central governement, but unclear funding |
| 27 | Olecki Klaster odnawialnej energii elektrycznej i cieplnej „ZIELONE OLECKO” | 54.03 | 22.51 | no information | klaster energii | recently created, no website yet, no further information, suppored by the central governement, but unclear funding |
| 28 | Bezpieczna i czysta energia dla Sokołowa | 52.41 | 22.25 | no information | klaster energii | recently created, no website yet, no further information, suppored by the central governement, but unclear funding |
| 29 | Brenergia - Klaster Lokalnego Systemu Energetycznego | 49.73 | 18.90 | no information | klaster energii | recently created, no website yet, no further information, suppored by the central governement, but unclear funding |
| 30 | Brzeski Klaster Energii Odnawialnej | 49.97 | 20.61 | no information | klaster energii | recently created, no website yet, no further information, suppored by the central governement, but unclear funding |
| 31 | Klaster Energii Zielony Pierścień Tarnowa | 50.01 | 20.99 | no information | klaster energii | recently created, no website yet, no further information, suppored by the central governement, but unclear funding |
| 32 | Klaster Mazurska Energia | 54.22 | 21.74 | no information | klaster energii | recently created, no website yet, no further information, suppored by the central governement, but unclear funding |
| 33 | Klaster OZE Grudziądz Obszar Zrównoważony Energetycznie | 53.48 | 18.75 | no information | klaster energii | recently created, no website yet, no further information, suppored by the central governement, but unclear funding |
| 34 | Konecki Klaster Energetyczny | 51.19 | 20.41 | no information | klaster energii | recently created, no website yet, no further information, suppored by the central governement, but unclear funding |

# Sampled CE initiatives in Spain

| **No** | **Descrip** | **lat** | **lon** | **energy type** | **organisation type** | **Web address** |
| --- | --- | --- | --- | --- | --- | --- |
| 1 | Xarxa per la sobirania energètica (Network for energy sovereignty) | 41.41 | 2.14 | other | Network | <http://transformativecities.org/atlas-of-utopias/atlas-11/> |
| 2 | Som energia | 41.97 | 2.84 | various 100% RE | Cooperative (Sociedad cooperativa, SC) | <http://transformativecities.org/atlas-of-utopias/atlas-12/> |
| 3 | Noáin-Valle de Elorz town council | 42.76 | -1.64 | various | Municipal government | <http://www.noticiasdenavarra.com/2015/10/16/vecinos/cuenca-de-pamplona/el-ayuntamiento-de-noain-sigue-apostando-por-la-energia-renovable> |
| 4 | La Red NELS | 42.82 | -1.64 | other | Network | <http://www.navarra.es/home_es/Temas/Medio+Ambiente/Sostenibilidad/Agenda+Local+21.htm> |
| 5 | Mesa de Transición Energética de Cádiz | 36.53 | -6.29 | other | Platform | <http://transformativecities.org/atlas-of-utopias/atlas-20/> |
| 6 | Xarxa per a la sobirania energètica Mallorca (Network for energy sovereignty Mallorca) | 39.57 | 2.65 | other | Network | <https://xsemallorca.wordpress.com/acerca-de/> |
| 7 | GoiEner | 43.05 | -2.18 | various 100% RE | cooperative (Sociedad cooperativa, SC) | <https://www.goiener.com/> |
| 8 | Zencer | 36.55 | -4.61 | various 100% RE | cooperative (Sociedad cooperativa, SC) | <http://www.zencer.es/> |
| 9 | Nosa Enerxía | 42.58 | -8.74 | various 100% RE | cooperative (Sociedad cooperativa, SC) | <https://www.nosaenerxia.com/> |
| 10 | Energetica coop | 41.65 | -4.73 | various 100% RE | cooperative (Sociedad cooperativa, SC) | <https://energeticacoop.es/> |
| 11 | Megaraenergia | 41.76 | -2.48 | various 100% RE | cooperative (Sociedad cooperativa, SC) | <https://www.megaraenergia.com/> |
| 12 | Lakabe Ecoaldea (Lakabe eco-village) | 42.87 | -1.35 | wind, solar, hydro | Village community with no formal structure | <https://lakabe.org/> |
| 13 | Kan Pascual, Barcelona (self-sufficient occupied community centre) | 41.41 | 2.09 | STE, Solar PV, Wind | Unknown | <https://www.diagonalperiodico.net/global/energia-limpia-descentralizada-y-democratizada.html> |
| 14 | Viure de l'Aire - Eòlica popular (community owned wind turbine), Pujalt | 41.71 | 1.43 | wind | Limited company (Sociedad limitada, SL) | <http://www.viuredelaire.cat/es/el-proyecto/energia-eolica-ciudadana.html> |
| 15 | ECOOO | 40.41 | -3.70 | other | Limited company (Sociedad limitada, SL) | <https://ecooo.es/> |
| 16 | Cubierta Fotovoltaica Mercado el Carmel | 41.42 | 2.16 | solar PV | Project (initiated by 17) | <https://www.elperiodico.com/es/barcelona/20070513/el-carmel-estrena-una-central-solar-financiada-por-los-vecinos-5449659> |
| 17 | Fundació Terra | 41.38 | 2.18 | other | Private foundation | <http://www.fundaciontierra.es/> |
| 18 | Cubierta Fotovoltaica Universidad Autonoma de Madrid | 40.54 | -3.69 | solar PV | Project (initiated by 17) | <http://www.elmundo.es/elmundo/2009/06/26/ciencia/1246011573.html> |
| 19 | Villawatt | 41.32 | 2.01 | other | Public-Private Citizen Governance Partnership (PPCP) (Consorci públic) | <http://www.viladecans.cat/es/vilawatt> |
| 20 | Unión Renovables Coop | 39.43 | -0.36 | other | cooperative (Sociedad cooperativa, SC) | http://www.unionrenovables.coop/ |

# Sampled CE initiatives in Sweden

| **No** | **Descrip** | **lat** | **lon** | **energy type** | **organisation type** | **Web address** |
| --- | --- | --- | --- | --- | --- | --- |
| 1 | Kvarkenvinden 1 | 63.81 | 20.27 | wind | cooperative | http://kvarkenvinden.se/ |
| 2 | Ollebacken vind ekonomisk förening | 63.61 | 15.29 | wind | cooperative | <https://www.ollebackenvind.se/> |
| 3 | Jamtkulingen ekonomiska förening | 63.16 | 14.54 | wind | cooperative | <http://www.jamtkulingen.se/> |
| 4 | Hällingarna Vind | 63.62 | 15.09 | wind | cooperative | |
| 5 | Offerdalsvind Ekonomisk förening | 63.39 | 13.91 | wind | cooperative | http://www.offerdalsvind.se/nyheter.html |
| 6 | Trärike vindkraftverk ekonomiska förening | 62.36 | 17.42 | wind | cooperative | <http://www.trarikevindkraft.se/index.htm> |
| 7 | Dala Vindkraft Ekonomisk förening | 60.89 | 15.11 | wind | cooperative | <http://dalavind.se/vindandelar-foreningar/dala-vindkraft-ekonomisk-forening/> |
| 8 | Vindela Ekonomisk | 60.68 | 13.66 | wind | cooperative | <http://dalavind.se/vindandelar-foreningar/vindela/> |
| 9 | Äppelbovind | 60.68 | 13.66 | wind | cooperative | <http://dalavind.se/vindandelar-foreningar/appelbovind/> |
| 10 | Fjällbergsvind ekonomisk förening | 60.08 | 14.98 | wind | cooperative | <http://dalavind.se/vindandelar-foreningar/fjallbergs-vind-ekonomiskforening/kontakt-2/> |
| 11 | Kyrkvinden ekonomiska förening | 60.61 | 15.64 | wind | cooperative | <http://www.kyrkvinden.se/> |
| 12 | Ljusterö Vind ekonomiska förening | 59.52 | 18.61 | wind | cooperative | <http://www.ljusterovind.se/> |
| 13 | Windy ekonomisk förening | 59.37 | 17.90 | wind | cooperative | <http://windy-vindkraft.se/> |
| 14 | Kooperativet Hammarövind 1 Ekonomisk förening | 59.33 | 13.43 | wind | cooperative | <http://hammarovind.se/index.html> |
| 15 | Telge Energi Vind ekonomisk förening | 59.20 | 17.62 | wind | cooperative | <https://telgeenergi.se/telgeenergivind> |
| 16 | Örebrovind | 59.24 | 15.24 | wind | cooperative | <http://orebrovind.se/index.html> |
| 17 | Kvismadalens vind Ekonomisk förening | 59.16 | 15.63 | wind | cooperative | <http://www.kdvind.se/> |
| 18 | Kolmårdsvind ekonomiska förening | 58.68 | 16.38 | wind | cooperative | <http://www.kolmardsvind.se/> |
| 19 | LinVind Kooperativ Ekonomisk Förening | 58.50 | 15.74 | wind | cooperative | <http://www.linvind.com/> |
| 20 | Lagmansberga Tvåan Vind Kooperativ Ekonomisk Förening | 58.40 | 15.15 | wind | cooperative | <http://www.lagmansbergavind.one/> |
| 21 | Q2 Mularp ekonomiska förening | 58.19 | 13.68 | wind | cooperative | <https://qvinnovindar.se/om-qvinnovindar/> |
| 22 | Qvinnovindar Sverige (QS) | 58.21 | 13.44 | wind | cooperative | <https://qvinnovindar.se/om-qvinnovindar/> |
| 23 | Göteborgsvind nr 1 ekonomisk förening | 57.72 | 11.91 | wind | cooperative | <http://www.gbgvind.se/> |
| 24 | Västanvind Vindkraftskooperativ Ekonomisk förening | 57.70 | 12.00 | wind | cooperative | <http://www.vastanvind.se/> |
| 25 | Zolcell 1:1 | 63.18 | 14.61 | solar | cooperative | <http://www.zolcell.se/> |
| 26 | Solel i Sala & Heby ekonomisk förening | 59.91 | 16.62 | solar | cooperative | <http://solelisalaheby.se/> |
| 27 | Solel i Lindesberg ek för | 59.45 | 14.89 | solar | cooperative | <http://www.solelilindesberg.se/> |
| 28 | Barsbro Kraftaktiebolag | 57.02 | 14.77 | hydro | Corporate Entity | <http://www.barsbrokraft.se/> |
| 29 | Gotlandsvind samfällighet | 57.63 | 18.32 | wind | cohesion association | https://energyarchipelago.com |
| 30 | Suderbyn People-Care ekonomisk förening | 57.62 | 18.27 | other | cooperative | https://energyarchipelago.com |
| 31 | Holmbod samfällighetsförening | 57.33 | 18.71 | wind | cohesion association | https://energyarchipelago.com |
| 32 | Närvind AB | 57.28 | 18.47 | wind | Corporate Entity | https://energyarchipelago.com |
| 33 | Hablingbovind Ekonomisk förening | 57.25 | 18.51 | wind | cooperative | https://energyarchipelago.com |
| 34 | Hablingbovind Vind Samfällighetsförening | 57.16 | 18.33 | wind | cohesion association | https://energyarchipelago.com |
| 35 | Rydebacke ekoby | 57.58 | 12.36 | other | unknown not for profit | https://energyarchipelago.com |
| 36 | Kölingareds byalag | 57.91 | 13.67 | Bioenergy | unknown not for profit | https://energyarchipelago.com |
| 37 | Ulricehamnsvind | 57.79 | 13.42 | wind | cooperative | https://energyarchipelago.com |
| 38 | Jönköping Energi Vind Ekonomisk förening | 57.78 | 14.16 | wind | cooperative | https://energyarchipelago.com |
| 39 | Smedens Samfällighetsförening | 57.75 | 14.18 | other | cohesion association | https://energyarchipelago.com |
| 40 | Ingatorps Farmartjänst Ek För | 57.69 | 15.36 | Bioenergy | cooperative | https://energyarchipelago.com |
| 41 | UppVind Ekonomisk förening | 57.20 | 15.35 | wind | cooperative | https://energyarchipelago.com |
| 42 | Karrydvind Ek. För | 57.13 | 15.16 | wind | cooperative | https://energyarchipelago.com |
| 43 | Vallerstadvind ekonomisk förening | 57.18 | 14.05 | wind | cooperative | https://energyarchipelago.com |
| 44 | Egen Kraft i Sverige Ekonomisk förening | 57.16 | 13.41 | other | cooperative | https://energyarchipelago.com |
| 45 | Varbergsvind | 57.11 | 12.25 | wind | cooperative | https://energyarchipelago.com |
| 46 | Falkenbergs Vindkraft Ek. för. | 56.90 | 12.49 | wind | cooperative | https://energyarchipelago.com |
| 47 | Hofbyvind Kooperativ Ekonomisk förening | 56.49 | 13.12 | wind | cooperative | https://energyarchipelago.com |
| 48 | Södra Ljunga Bioenergi AB | 56.76 | 13.99 | Bioenergy | Corporate Entity | https://energyarchipelago.com, https://gulasidorna.eniro.se/f/s%C3%B6dra-ljunga-bioenergi-ab:14375389 |
| 49 | Kalmarsund Vind Ekonomisk förening | 56.67 | 16.36 | wind | cooperative | https://energyarchipelago.com, https://kalmarenergi.se/vind/kalmarsundvind/ |
| 50 | Kalmarsund Sol Ekonomisk förening | 56.66 | 16.36 | solar | cooperative | [https://energyarchipelago.com](https://energyarchipelago.com/) |
| 51 | Kalmarsunds Vind II | 56.68 | 16.31 | wind | cooperative | https://energyarchipelago.com, https://kalmarenergi.se/vind/kalmarsundvind/ |
| 52 | Blekinge Vindkraft Ekonomisk förening | 56.18 | 15.76 | wind | cooperative | https://energyarchipelago.com, http://blekingevindkraft.se/ |
| 53 | Solel i Helsingborg | 56.05 | 12.69 | solar | cooperative | https://energyarchipelago.com, http://solarpark.se/ |
| 54 | Glimminge Vindsamfällighetsförening | 56.22 | 12.61 | wind | cooperative | https://energyarchipelago.com, https://gulasidorna.eniro.se/f/glimminge-vindsamf%C3%A4llighetsf%C3%B6rening:14434397 |
| 55 | Farmarenergi i Eslöv AB | 55.89 | 13.39 | Bioenergy | Corporate Entity | https://energyarchipelago.com, https://www.lrf.se/globalassets/dokument/foretagande/de-grona-naringarna/fornybar-energi/framtidsforetag/feab_energifakta.pdf |
| 56 | Viking vind ekonomisk förening | 55.81 | 12.97 | wind | cooperative | https://energyarchipelago.com |
| 57 | Annelöv-Norrvidinge Vindsamfällighet | 55.84 | 13.10 | wind | cooperative | https://energyarchipelago.com |
| 58 | Önnevind | 56.06 | 14.02 | wind | cooperative | https://energyarchipelago.com |
| 59 | Råbelöf Ströö Karsholm Handelsbolag | 56.03 | 14.16 | wind | Corporate Entity | https://energyarchipelago.com |
| 60 | Lundavind nr 1 kooperativ | 55.79 | 14.17 | wind | cooperative | https://energyarchipelago.com, http://lundavind.se/index.html |
| 61 | Samfällighetsföreningen Arendala Vindmölla | 55.68 | 13.42 | wind | cohesion association | https://energyarchipelago.com |
| 62 | Solbyn | 55.70 | 13.19 | other | housing cooperative | https://energyarchipelago.com, https://theecologist.org/2015/feb/23/green-living-swedens-ecological-village-solbyn |
| 63 | Bostadsrättsföreningen Myrstacken | 55.54 | 13.11 | other | housing cooperative | https://energyarchipelago.com |
| 64 | Vindsamfällighetsföreningen Gislöv II | 55.36 | 13.24 | wind | cohesion association | https://energyarchipelago.com |
| 65 | Ekobyn i Baskemölla | 55.59 | 14.31 | other | housing cooperative | https://energyarchipelago.com, http://www.appelkusten.se/ekobyn-i-baskemolla/ |
| 66 | Harads Arctic Heat AB | 66.07 | 20.98 | Bioenergy | Corporate Entity | https://energyarchipelago.com, http://www.haradsarcticheat.se/ |
| 67 | Korpilombolo byförening | 66.85 | 23.06 | Bioenergy | cooperative | https://energyarchipelago.com, http://www.haradsarcticheat.se/ |
| 68 | Hedenäsets Närvärme AB | 66.23 | 23.68 | Bioenergy | Corporate Entity | https://energyarchipelago.com, http://www.haradsarcticheat.se/ |
| 69 | Grannäs intresseförening | 65.53 | 17.54 | hydro | cooperative | https://energyarchipelago.com, http://www.haradsarcticheat.se/ |

# Sampled CE initiatives in the UK

| **No** | **Descrip** | **lat** | **lon** | **energy type** | **organisation type** | **Web address** |
| --- | --- | --- | --- | --- | --- | --- |
| 1 | Dingwall Wind Co-op | 57.60 | -4.43 | wind | Cooperative (Industrial and Provident Society) | http://dingwallwind.org.uk/ |
| 2 | Braemar community energy | 57.01 | -3.41 | hydro | Community Benefit Society (Registered society) | braemarhydro.org.uk |
| 3 | Isle of Gigha Community Heritage trust | 55.68 | -5.74 | wind | Community Heritage trust (Private Limited Company without share capital & charity) | http://www.hie.co.uk/community-support/managing-community-funding/isle-of-gigha-heritage-trust.html |
| 4 | Ashton Hayes going carbon Neutral - Ashton Hayes Community Energy (AHCE) | 53.22 | -2.73 | solar, wind, other (district heating, emissions reduction, energy efficientcy) | Community Interest Company (Private Limited Company without share capital) | http://www.goingcarbonneutral.co.uk/ |
| 5 | Reepham Green Team | 52.76 | 1.11 | biofuel and energy reduction | Informal social network of individuals and representatives from community organisations | https://grassrootsinnovations.files.wordpress.com/2012/08/reepham-green-team-innovation-history-july-2012.pdf |
| 6 | Udny Community Trust | 57.34 | -2.18 | wind | Community Development Trust (Private Limited Company without share capital) | https://udnycommunitytrust.org.uk/ |
| 7 | Fintry Development Trust | 56.12 | -3.94 | wind , other | Community Development Trust (Private Limited Company without share capital & charity) | http://fintrydt.org.uk/ |
| 8 | Applecross Community Hydro | 57.67 | -5.22 | hydro, other | Community Benefit Society (Registered society) | http://www.applecrosshydro.scot/ |
| 9 | Low carbon Laddock and Ladock Carbon Co-operative Ltd | 50.32 | -4.96 | sola, wind, biomass | Community Benefit Company and Cooperative (Industrial and provident Societies) | http://www.transition-lgr.org/what-is-the-low-carbon-project/ |
| 10 | Fowey Renewable Energy Enterprise | 50.33 | -4.64 | wind, solar | Industrial and provident Society | |
| 11 | Community Power Cornwall | 50.28 | -5.21 | other | Cooperative (Registered Society) | https://communitypowercornwall.coop/ |
| 12 | Wadebridge Renewable Energy Network | 50.52 | -4.84 | solar | Community Interest company (not registered) | http://www.wren.uk.com/ |
| 13 | Meadow Blue Community Energy (MBCE) | 50.93 | -0.46 | solar | Community Benefit Society (Registered society) | http://meadowblue-energy.org |
| 14 | Westmill Solar and Wind cooperatives | 51.76 | -1.25 | solar/wind | Cooperative (Industrial and Provident Society) | http://westmillsolar.coop/ |
| 15 | Stockport hydro | 53.40 | -2.10 | hydro | Cooperative (Industrial and Provident Society) | http://www.stockport-hydro.co.uk/index.php?page=history |
| 16 | Torrs Community Hydro | 53.36 | -2.00 | hydro | Cooperative (Industrial and Provident Society) | http://www.torrshydro.org/ |
| 17 | South Wheatley Environmental Trust Wind Turbine Project | 50.71 | -4.49 | wind | Community Development Trust (Private Limited Company without share capital & charity) | https://grassrootsinnovations.files.wordpress.com/2012/10/sw-final1.pdf |
| 18 | The Barley Bridge Weir Hydro, Stavely | 54.38 | -2.82 | unsuccessful | Local group with no formal structure | https://grassrootsinnovations.files.wordpress.com/2012/06/barley-bridge-weir-innovation-history.pdf |
| 19 | Sustainable south brent | 50.42 | -3.83 | wind,solar,other | Community Development Trust (Private Limited Company without share capital & charity) | http://www.sustainablesouthbrent.org.uk |
| 20 | Totnes Renwable Energy Society (TRESOC) | 50.43 | -3.68 | wind, hydro, solar, other | Community Benefit Society (Industrial and Provident Society) | https://tresoc.co.uk/ |
| 21 | Bridport Renewable Energy Group | 50.73 | -2.76 | anaerobic digestion | Community Interest Company (Private Limited Company without share capital) | http://www.sustainabledorset.org/item/bridport-renewable-energy-group/ |
| 22 | Bath & West Community Energy & Mongoose energy | 51.37 | -2.37 | solar, other | Community Benefit Society (Industrial and Provident Society) | http://www.bwce.coop/ |
| 23 | Wedmore Community Power Cooperative | 51.22 | -2.81 | solar | Community Benefit Society (Industrial and Provident Society) | http://www.wedmorecpc.co.uk/ |
| 24 | West Solent Solar Cooperative | 50.76 | -1.55 | solar | Cooperative (Industrial and Provident Society) | http://westsolentsolar.coop/projects/ |
| 25 | Ovesco | 50.87 | 0.01 | solar | Community Benefit Society (Industrial and Provident Society) | https://ovesco.co.uk/ |
| 26 | Brighton energy cooperative | 50.83 | -0.15 | solar | Community Benefit Society (Industrial and Provident Society) | https://brightonenergy.org.uk/ |
| 27 | Hampshire Renewable Energy Co-operative | 51.27 | -1.07 | solar, wind | Cooperative (Industrial and Provident Society) | http://hampshire-energy.coop/ |
| 28 | Transition town Brixton - Brixton Energy - repowering London | 51.46 | , -0.115681 | other | Cooperative (Industrial and Provident Society) | https://brixtonenergy.co.uk/ |
| 29 | Teddington & Ham Hydro | 51.43 | -0.32 | hydro | Community Benefit Society (Industrial and Provident Society) | http://www.hamhydro.org/ |
| 30 | Green Energy Nayland | 51.97 | 0.87 | solar, other | Community Benefit Society (Industrial and Provident Society) | http://www.greenenergynayland.org.uk |
| 31 | Gamlingay community turbine | 52.14 | -0.18 | wind | Private Limited Company | http://www.gamlingay-community-turbine.co.uk/ |
| 32 | Norwich community solar | 52.63 | 1.30 | solar | Cooperative (Registered Society) | https://www.norwichcommunitysolar.coop/ |
| 33 | Southern Staffordshire Community Energy & Chase Community Solar | 52.68 | -1.83 | solar | Community Benefit Society (Industrial and Provident Society) | ssce.co.uk/ |
| 34 | West Oxford Community Renewables | 51.75 | -1.27 | wind, solar, hydro | Community Benefit Society (Industrial and Provident Society) | http://wocore.org.uk/ |
| 35 | Shareenergy | 52.71 | -2.75 | other | Facilitation network - Registered Society (Co-operative) | https://www.sharenergy.coop/ |
| 36 | Low Carbon Oxford North | 51.78 | -1.27 | other | Community Development Trust (Private Limited Company without share capital) | http://www.lcon.org.uk/ |
| 37 | Community Energy Warwickshire | 52.18 | -1.70 | solar | Community Benefit Society (Industrial and Provident Society) | http://www.cew.coop/ |
| 38 | Bro Dyfi Community Renewables | 52.60 | -3.85 | wind | Cooperative (Industrial and Provident Society) | http://www.ecodyfi.org.uk/energy/energybdcr.htm |
| 39 | Awel coop | 51.80 | -3.82 | wind | Cooperative (Registered Society) | http://awel.coop/ |
| 40 | Anafon hydro | 53.23 | -4.01 | hydro | Community Benefit Society (Industrial and Provident Society) | http://www.anafonhydro.co.uk/ |
| 41 | Four Winds Energy Cooperative 1 | 53.24 | -1.35 | wind | Cooperative (Industrial and Provident Society) | http://www.fourwinds.coop/turbine-sites/duckmanton/ |
| 42 | Four Winds Energy Cooperative 2 | 53.59 | -1.40 | wind | Cooperative (Industrial and Provident Society) | http://www.fourwinds.coop/shafton/ |
| 43 | Saddleworth Community Hydro | 53.53 | -1.97 | hyrdo | Community Benefit Society (Industrial and Provident Society) | https://sites.google.com/site/saddleworthcommunityhydro/home |
| 44 | Transition Town West Kirby | 53.37 | -3.18 | solar | Local group with no formal structure | http://www.transitiontownwestkirby.org.uk/ |
| 45 | Settle community Hydro | 54.07 | -2.28 | hydro | Community Benefit Society (Industrial and Provident Society) | http://www.settlehydro.org.uk |
| 46 | River Bain Hydro | 54.31 | -2.10 | hydro | Community Benefit Society (Industrial and Provident Society) | https://en.wikipedia.org/wiki/River_Bain_Hydro |
| 47 | Morecambe Bay Community Renewables | 54.08 | -2.75 | solar, biomass | Community Benefit Society (Industrial and Provident Society) | http://www.morerenewables.co.uk/ |
| 48 | High Winds community Energy society (formerly Baywind) | 54.12 | -3.24 | wind | Community Benefit Society (Registered society) | https://www.highwinds.coop/ |
| 49 | Energy4All | 54.12 | -3.24 | various | Facilitation network - Private Limited Company | https://energy4all.co.uk/ |
| 50 | Transition Linlithgow | 55.97 | -3.60 | solar thermal, solar PV | Scottish charitable incorporated organisation | http://transitionlinlithgow.org.uk/ |
| 51 | Neilston development trust | 55.78 | -4.43 | wind | Community Development Trust (Private Limited Company without share capital) | http://www.communitylandscotland.org.uk/members/neilston-development-trust/ |
| 52 | Barra & Vatersay Wind Energy Ltd | 56.98 | -7.46 | wind | Private Limited Company | http://www.smartestenergy.com/power-purchase/barra-vatersay-wind-energy/ |
| 53 | Transition Tynedale | 54.97 | -2.11 | other | Community Development Trust (Private Limited Company without share capital) | https://blog.transitiontynedale.org/ |
| 54 | Galloway Carbon Action | 54.88 | -4.18 | other | Project | http://weesleekit.info/carbon/programmes/galloway-carbon-action |
| 55 | Spirit of Lanarkshire Wind Energy Co-operative | 55.66 | -4.20 | wind | Cooperative (Industrial and Provident Society) | http://www.spiritoflanarkshire.coop/ |
| 56 | Allt Dearg/Sròndoire Community Wind Farms | 55.93 | -5.49 | wind | Private Limited Company | http://lochfynewindfarms.com/Home.aspx |
| 57 | St Bride’s Community Centre | 55.56 | -3.84 | biomass | Community Development Trust (Private Limited Company without share capital) | https://www.treco.co.uk/case-study/detail/st-brides-community-centre |
| 58 | Coigach Community Development Company | 58.01 | -5.34 | wind | Community Development Trust (Private Limited Company without share capital) | https://coigachwindpower.wordpress.com/ |
| 59 | Heat Smart Orkney | 59.03 | -3.18 | wind | Community Development Trust (Private Limited Company without share capital) | http://rewdt.org/index.php?link=projects&id=2 |
| 60 | Foula Community Electricity Scheme | 60.13 | -2.07 | wind, hydro, solar, other | Scottish charitable incorporated organisation | www.fces.org.uk/ |
| 61 | Camphill Community Clanabogan (Omagh Environment and Energy Consortium) | 54.60 | -7.31 | wind, biomass, solar | Community Development Trust (Private Limited Company without share capital) | http://www.camphillclanabogan.com/index.php?Environment-124 |
| 62 | Parish Church of Saint George | 54.60 | -5.93 | solar | Church committee | http://www.brysonenergy.org/social-impact/case-studies/st-georges-pv-scheme |
